# Supplementary material for: CardioTF, a database of deconstructing transcriptional circuits in the heart system
Source: PeerJ. 2016 Aug 23;4:e2339. doi: 10.7717/peerj.2339 (PMC5012272; doi:10.7717/peerj.2339)
Supplement: Supplemental Information 2 — Sheet 1 (CardioJournalDistribution) includes the top 100 journals that favor Weinstein-like papers. Sheet 2 (NotHeartTFs) includes all TF names that have never appeared in the four sources of supporting evidence. Sheet 3 (MGI_TFs) is the TF names from MGI database. Sheet 4 (PubMed_TFs) lists TF names from Weinstein-like PubMed abstracts. Sheet 5 (Cardio_GO_UK_TFs) includes TF names from UK Cardio-GO project. Sheet 5 (Cardio_lineage_TFs) includes TF names from RNA-seq or microarray analysis. Sheet 6 (core_TFs) defines the core 81 TFs known to be involved in heart development. Sheet 7 (CardioJournalDistribution_norm) includes journals ranked by publication rate (normalized version). [file peerj-04-2339-s002.xls]

## Sheet: CardioJournalDistribution
Journal Name	Weinstein-like abstract number
DEV BIOL	968	11807	1960
J BIOL CHEM	848	142885	1945
DEVELOPMENT	718	11288	1987
PLOS ONE	491		2006
PROC NATL ACAD SCI USA	453		1915
DEV DYN	440		1992
MOL CELL BIOL	358		1981
MOL BIOL CELL	281		1992
J CELL SCI	280		1966
BIOCHEM BIOPHYS RES COMMUN	278		1960
BLOOD	255		1946
CIRC RES	253		1953
J CELL BIOL	232		1962
DEV CELL	222		2001
GENES DEV	176		1987
STEM CELLS	173		1981
HUM MOL GENET	158		1992
MECH DEV	152		1990
NATURE	152		1945
CURR BIOL	144		1991
J MOL CELL CARDIOL	142		1970
J NEUROSCI	133		1981
EXP CELL RES	130		1953
PLOS GENET	129		2005
NAT CELL BIOL	124		1999
BMC DEV BIOL	120		2001
EMBO J	116		1982
INT J DEV BIOL	114		1989
ONCOGENE	112		1987
GENESIS	110		2000
NUCLEIC ACIDS RES	108
CELL CYCLE	106
CELL	103
INT J CARDIOL	101
GENETICS	100
GENE EXPR PATTERNS	100
CELL STEM CELL	96
CARDIOVASC RES	86
FASEB J	81
AM J PHYSIOL HEART CIRC PHYSIOL	81
J CLIN INVEST	80
ARTERIOSCLER THROMB VASC BIOL	77
J CELL BIOCHEM	75
BIOCHIM BIOPHYS ACTA	75
STEM CELLS DEV	70
PEDIATR CARDIOL	69
MOL CELL	68
SCIENCE	65
GENES CELLS	62
DEV GROWTH DIFFER	60
DIFFERENTIATION	60
J CELL PHYSIOL	59
ANN THORAC SURG	57
CELL SIGNAL	55
INT J BIOCHEM CELL BIOL	54
CIRCULATION	53
DEV GENES EVOL	52
PLOS BIOL	51
FEBS LETT	50
CANCER RES	50
J MOL BIOL	50
AM J PHYSIOL, CELL PHYSIOL	49
MOL CELL NEUROSCI	46
CELL TISSUE RES	46
J IMMUNOL	44
J CELL MOL MED	44
AM J PATHOL	42
NAT GENET	42
EMBO REP	41
NEURAL DEV	40
CELL RES	39
CELL MOTIL CYTOSKELETON	38
METHODS MOL BIOL	37
BONE	37
EVOL DEV	37
CELL ADH MIGR	36
ENDOCRINOLOGY	36
NEURON	35
BMC CELL BIOL	35
J EXP MED	34
CELLS TISSUES ORGANS (PRINT)	33
NAT STRUCT MOL BIOL	33
EUR J ECHOCARDIOGR	33
NAT NEUROSCI	32
J AM SOC NEPHROL	32
BIOL REPROD	32
EUR J CELL BIOL	32
J COMP NEUROL	32
J THORAC CARDIOVASC SURG	32
INTERACT CARDIOVASC THORAC SURG	31
PLANT CELL	31
CARDIOVASC PATHOL	30
MOL ENDOCRINOL	30
INVEST OPHTHALMOL VIS SCI	30
BIOCHEMISTRY	30
SEMIN CELL DEV BIOL	29
PACING CLIN ELECTROPHYSIOL	29
CURR TOP DEV BIOL	29
HEART RHYTHM	29
GENE	29

## Sheet: NotHeartTFs
Insm2
Arid3c
Zbed4
Zfp566
L3mbtl1
Zfp248
Zfp111
Zfp593
Zfp354b
Prdm15
Zfhx4
Batf3
Tcfl5
Tbx10
Zfp273
Zfp113
Zscan29
Homez
Zbtb26
Zfp846
Batf
Dmrta1
Zfp105
Zfp551
Sox21
Zfp2
Zfp879
Zbtb39
Zfp300
Zfp677
Isx
Zfp558
Zfp72
Zxdb
Bnc2
Zkscan7
Zfp189
Cebpe
Zfp738
Zfp182
Foxi2
Tfap4
Zfp958
Zbtb8b
Tox
Zfp518a
Zfp541
Pou2f3
Egr4
Ascl4
Rorb
Dmrtc2
Arid5a
Nfkbie
Zfp64
Klf16
Zfp780b
Zfp534
Csrnp3
Zfp41
Tox2
Myt1l
AA987161
Zfp11
Rex2
Zik1
Zfp69
Zfp131
Hsfy2
Zfp583
Crebl2
Zfp605
Rbak
Zfp53
Zfp329
Zfp26
Zfp711
Hoxc4
Zfp92
Tgif2lx2
Zfp764
Zfp354c
Zbtb6
Mafa
Zfp800
Zfp446
Zfp709
Zfp71-rs1
Zfp791
Zbtb49
Ehf
Maff
Gm13051
Zfp112
Zbtb37
Zfp560
Zfp85-rs1
Dmrtb1
A530054K11Rik
Zfp691
Gm13212
Rfx8
Zfp712
Zkscan8
Zfp212
Zfp87
Zfp382
Sp9
Ascl3
St18
Zfp366
Zfp39
Zfp600
Npas4
Zfp287
Zfp457
Zfp518b
Gm13242
Zglp1
Nfxl1
Zfp341
Zfp7
Hnf4g
Zfp872
Zkscan16
Bnc1
Zfp786
Zfp280b
Zfp647
Zc3h6
Dmrtc1a
Zfp689
Zfp37
Zfp184
Foxo6
Sp140
Hsf5
Prdm9
Zfp661
Tgif2lx1
Zfp799
Zfp51
Hdx
Zfp14
Nkx2-4
Gm13154
Zfp719
Gm13139
Zfp235
Foxd4
Irx6
Zfp418
Zfp597
Zfp78
Zfp641
Zfp286
Creb3l3
Zbtb32
Sp110
Zfp169
Zfp3
Zfp82
Zfp40
Zfp420
Zfp575
Tonsl
Stat4
Batf2
Zfp667
Zfp354a
Zfp595
Zfp708
Zscan20
Zfp618
Zfp324
Zfp334
Foxr1
Zfp454
Ahrr
Gm13251
Zbtb34
Zfp174
Nfkbid
Spic
Foxb2
Zscan5b
Zfp563
Tox3
Zkscan2
Csrnp2
Klf17
Zfp160
Zfp536

## Sheet: MGI_TFs
MGI
Sall4
Zfpm1
Bbx
Sox4
Meis1
Gata1
Pitx2
Rarg
Foxm1
Myc
Nr6a1
Atmin
Tfap2b
Mta1
Tal1
Ascl2
Gbx2
Tcf21
Trp53
Gata6
Hoxa2
Tgif2
Tead1
Msx1
Whsc1
Runx2
Prdm1
Scx
Hand2
Hey1
Ybx1
Nkx2-1
Rfx3
E2f5
Dlx2
Gcm1
Klf5
Six1
Rela
Foxa2
Smad4
Crem
Vdr
Foxs1
Ovol2
Foxq1
Erg
Sp4
Smad9
Rbpj
Atrx
Patz1
Emx2
Hhex
Smarca1
Nr2e1
Foxp3
Vezf1
En1
Sox13
Npas3
Foxn1
Trp73
Kat7
Tbx1
Sp1
Prdm16
Rfx4
Tfap2a
Rere
Runx1
Grhl1
Esr1
Foxh1
Stat1
Fli1
Twist1
Tbp
Zfpm2
Fosl1
Creb1
Hoxa13
Foxc2
Smad5
Nr3c1
Arid3b
Tead2
Zic2
Noto
Atf2
Phox2b
Sox9
Klf6
Id1
Pax2
Plagl1
Foxj1
Elk3
E2f7
Zeb1
Etv2
Gata5
Shox2
Gsc
Foxg1
Tbx2
Dlx1
Pax1
Irx5
Ahr
Srf
Ets1
Ets2
Foxp4
Foxf1
Nfatc3
Egr1
Osr1
Arntl
Gata4
Jarid2
Mafb
Mef2c
Rel
Junb
Mixl1
Pknox1
Relb
Ppara
Npas2
Hif3a
Dnmt3l
Pbx1
Smad1
Arnt
Pax6
Tcf7
Sp2
Tbx6
Rarb
Hoxb4
Nhlh1
Arid4b
Cdx4
Clock
Arid1a
Rora
Hoxa1
Nkx2-6
Foxp1
Nfatc4
Prrx1
Twist2
Rfx5
Wt1
Jund
Zfp148
Nr2f2
Onecut1
Irx4
E2f3
Lhx1
Tcf7l1
Tbx3
Sox18
Sox1
Tbx4
Mesp2
Smad6
Rxrb
Otx2
Bach1
Ar
Klf2
Sall1
Erf
Sox11
Lef1
Foxe3
Crx
Nr1h2
Pparg
Atoh7
Pax3
E2f8
Ncor2
Nfat5
Hopx
Xbp1
Atf7
Gli3
Lmx1b
Arid4a
Kat6a
Dnmt3b
Prox1
Irf1
Msx2
Nr3c2
Nr1h3
Isl1
E2f1
Nkx2-3
Gfi1b
Smad2
Hif1a
Mef2d
Kdm5c
Ppp1r13l
Sox5
Sox6
Meox2
Mecom
Bcl6
Thra
Smad7
Tfam
Myb
Hsf2
Grhl2
Gata3
Foxd3
Hoxa3
Etv6
Tgif1
Nhlh2
Tbx20
Mycn
Tsc22d1
Pax8
E2f4
Mef2a
Dlx5
Dlx3
Snai1
Nkx2-5
Mnx1
T
Trp63
Irx3
Pitx1
Mtf1
Tbx21
Hoxd3
Sox12
Nfatc1
Prrx2
Hey2
Tbx5
Rxra
Heyl
Mesp1
Rara
Nfe2
Foxc1
Hand1
Pgr
Neurod6
Id3
Nr1h4
Myod1
Foxo3
Ubp1
Smad3
Epas1
Cebpa
Cdx2
Nr5a1
Klf15
Esx1
Zic3
Pbrm1
Gatad2a
Lbx1
Esr2
Tbx18
Gata2
Sp3
Esrrg
Jun
Grhl3
Foxp2
Emx1
Foxo1
Stat3
Six2
Arid3a
Thrb
Nfe2l2
Sox7

## Sheet: PubMed_TFs
Pou5f1
Myod1
Gata4
Smad1
Sox2
Nanog
Runx2
Gli1
Sox9
Trp53
Myog
Smad2
Smad3
Pax6
Tcf3
Srf
Pax3
Myf5
Nkx2-1
Gli3
Smad4
Nkx2-5
Runx1
Gata1
Tbx1
Pitx2
Otx2
Gata6
Hes1
Gli2
Myc
Lef1
Pax2
Rbpj
Gata2
Tbx5
Twist1
Msx1
Mef2c
Ascl1
Isl1
Dlx5
Hand2
T
Klf4
Cdx2
Dlx1
Jun
Sox10
Snai1
Tal1
Stat3
Foxa2
Hmx3
Mef2a
Sp1
Hand1
Gata3
Pax7
Meis1
Mitf
En1
Dlx2
Trp63
Smad7
Pbx1
Six1
E2f1
Sp7
Tbx3
Smad5
Hey1
Lhx1
Nfatc1
Hes5
Myf6
Ets1
Atoh1
Msx2
Wt1
Hey2
Sox17
Hif1a
Ctcf
Pax9
Tcf7
Mll1
Egr2
Neurog1
Nfatc2
Lhx2
Pax1
Prox1
Dlx6
Emx2
Mycn
Nkx2-2
Snai2
Noto
Hoxa1
Klf1
Tbx2
Six3
Mafb
Creb1
Tcf7l2
Yy1
Neurog2
Rxra
Olig2
Myb
Foxc1
Hoxb1
Rara
Foxg1
Neurog3
Sfpi1
Nr2f2
Cdx1
Hoxa3
Pdx1
Fos
Gbx2
Foxc2
Dnmt1
Foxo1
Prdm1
Otx1
Dnmt3a
Smad6
Hoxa2
Gata5
Zic1
Foxo4
Hoxa9
Eomes
Mesp2
Hoxd13
Six2
Pax5
Dnmt3b
Klf2
Sp3
Ebf1
Zfpm2
Sox6
Runx3
Cebpa
Hoxb4
Tbx18
Zfpm1
Dlx3
Sox4
Sall4
Jarid2
Pitx1
Etv5
Tbx20
Tbp
Pparg
Foxj1
Epas1
Shox2
Sall1
Ptf1a
Hnf4a
Zic3
Nr2f1
Cdx4
Tcf21
Neurod1
Ovol1
Nkx3-2
Zic2
Rarb
Hoxb2
Egr1
Tet1
Zeb1
Hhex
Hoxd11
Mesp1
Meis2
Sox5
Lhx3
Hoxb3
Msc
Tead1
Tfap2a
Scx
Irx3
Six4
Ascl2
Foxa1
Hnf1a
Hnf1b
Tbx6
Alx4
Pax8
Ikzf1
Zeb2
Nr5a1
Nfatc3
Lmx1b
En2
Tcf12
Stat1
Hoxa13
Plagl1
Sall3
Phox2b
Prrx1
Max
Gsc
Tcf7l1
Sox3
Hoxc8
E2f3
Nfatc4
Mixl1
Hesx1
Fli1
Hes7
Irx1
Foxd3
Arx
Suz12
Tbx4
Sox18
Arnt
Vsx2
Emx1
Gsx2
Sox7
Pou1f1
Etv4
Sim1
Ets2
Foxf1
Twist2
Irx2
Etv2
Rest
Lbx1
Pou4f1
Nr4a2
Gfi1b
Maf
Klf5
Rarg
Irx5
Sox11
Pknox1
Irx4
Lmx1a
Gfi1
Sox8
Nkx6-1
Hoxd4
Mecom
Hoxb8
Figla
Id2
Nr2e1
Hoxa7
Foxh1
Ncor2
Zfp42
Foxo3
Atoh7
Hoxd12
Irf6
Hoxa4
Arntl
Nkx3-1
Usf1
Nfib
Meox1
Hoxb5
Tcf15
Nfkb1
Stat5a
Smad9
Hopx
Nhlh1
Tlx1
Pou4f2
Meox2
Mef2d
Elf5
Tgif1
Nrl
Nr6a1
Id3
Pou2f1
Ppara
Hoxa5
E2f4
Foxp2
Satb2
Pou3f2
Dnmt3l
Crx
Dbx1
Hoxa11
Trps1
Hes6
Atf2
E2f2
Olig1
Tcf4
Osr2
Elf4
Prdm14
Foxn1
Bhlhe41
Bhlhe40
Zbtb16
Smarcc1
Atf4
Cebpb
Pax4
Barx1
Tfap2c
Tbx15
Crem
Prrx2
Lhx8
Bcl11a
Hoxd10
Gcm2
Hoxb9
Onecut1
Bcl6
Ahr
Six6
Kat5
Nfic
Nr4a1
Tead4
Lhx5
Etv1
Mta1
Nfix
Nfia
Kat8
Heyl
Neurod4
Lhx6
Hmga2
Lhx9
Pbx2
Nr0b1
Foxl2
Bcl11b
Rax
Rora
Hoxb6
Osr1
Arid1a
Esrrb
Foxe1
Hes3
Six5
Phox2a
Foxf2
Cux1
Uncx
Tfe3
Clock
Id1
Nr0b2
Hlx
Gbx1
Zfp426
Tbr1
Ncor1
Irf1
Etv6
Cxxc1
Pitx3
Olig3
Nr5a2
Gsx1
Foxp1
Insm1
Pou3f1
Grhl3
Nfe2l2
Tshz1
Sp4
Mnx1
Ybx1
Zfp386
Foxn4
Isl2
Mnt
Smarca5
Nkx6-2
Gabpa
Kat6a
Sim2
Foxi1
Prop1
Sp8
Rcor2
Tead2
Hoxa10
Zfp148
Pou3f4
Egr3
Dmbx1
Hoxb7
Klf15
Fezf2
Id4
Tbpl1
Mta2
Vax1
Otp
Zbtb18
Foxa3
Atf6
Neurod6
Hmx1
Evx2
Tsc22d1
Rfx1
Foxq1
Atf3
Sohlh1
Nr2e3
Nr1h2
Sox1
Tshz3
Hoxd3
Rfx3
Meis3
Klf6
Dlx4
Klf10
Ncoa3
Hmx2
Foxl1
Foxm1
Alx3
Utf1
Pou3f3
Gsc2
Kdm5a
Foxk1
Gcm1
Zfp1
Fezf1
Rela
Jdp2
Bach2
Nr2c1
Sox13
Atrx
Mkx
Foxd1
Tbpl2
Ddit3
Rere
Evx1
E2f8
Kdm5b
Dmrt1
Elk1
Tef
Tfam
Tgif2
Zbtb17
Hsf1
Fosl1
Pou2f2
Zfp521
Zfp57
Klf3
Fosb
Sohlh2
Satb1
Pbx3
Nkx2-6
Peg3
Lyl1
Sox15
Nr4a3
Prdm16
Ferd3l
Tfeb
E2f6
Grhl2
E2f7
Atoh8
Spdef
Mxi1
Zic5
Patz1
Etv3
Tbx22
Bach1
Tlx2
E2f5
Ncoa2
Atf1
Hbp1
Glis1
Dmrt2
Foxp4
Thrb
Mbd1
Sall2
Lhx4
Zbtb7a
Tfec
Hoxd9
Erg
Rel
Zic4
Mxd3
Glis3
Nr1h3
Sp6
Barx2
Nfkbia
Irf8
Bhlha15
Ebf2
Aire
Hoxd8
Pou4f3
Ovol2
Usf2
Esx1
Vsx1
Smarce1
Mga
Alx1
Stat6
Fosl2
Snai3
Hoxd1
Tlx3
Nr3c1
Mxd4
Zfp423
Nfya
Esr1
Hoxc6
E4f1
Klf13
Bhlhe23
Barhl2
Irf4
Srebf1
Cux2
Sp5
Taf1
Vezf1
Ebf4
Purb
Pou5f2
Vax2
Pbrm1
Helt
Prdm6
Erf
Foxd2
Irf7
Ubtf
Scrt1
Klf11
Tbx19
Klf9
Mafk
Atmin
Arnt2
Mybl2
Hes2
Rbpjl
Nfkb2
Rxrb
Npas1
Arid5b
Tfap2b
Foxi3
Tead3
Pknox2
Hmbox1
Nobox
Nfkbib
Tcf25
Nkx1-2
Hinfp
Elf3
Nhlh2
Elk4
Kdm2a
Deaf1
Zscan10
Stat5b
Bhlhe22
Hoxc5
Prdm5
Hoxa6
Nkx2-3
Nr1h4
Irf3
Bsx
Spib
Trp73
Elf1
Tfap2d
Hsf2
Nrf1
Nfe2l1
Junb
Ikzf3
Hoxb13
Zbtb33
Kat6b
Xbp1
Foxj3
Csrnp1
Esrrg
Nkx2-9
Dmap1
Nfat5
Foxb1
Nr2c2
Smarcc2
Tfcp2l1
Tfap2e
Arid3b
Csda
Pgr
Ppard
Prdm13
Vdr
Ssrp1
Gatad1
Bcl6b
Hivep3
Msgn1
Rorc
Aebp2
Klf8
Cic
Hivep2
Dmrt3
Arid4a
Ncoa1
Lbx2
Ikzf2
Ebf3
Mxd1
Hif3a
Nfe2
Maz
Neurod2
Grhl1
Npas3
Glis2
Zfp322a
Arid3a
Tfcp2
Sox30
Kdm5c
Plag1
Tshz2
Hoxc13
Zbtb38
Bhlha9
Mycl1
Dnajc1
Sebox
Mzf1
Nono
Zfp335
Ctcfl
Pura
Hoxc10
Hic2
Foxr2
Zbtb21
Fev
Rfx2
Creb3l1
Zbed6
Relb
Zbtb7c
Wbp7
Myt1
Ybx2
Hic1
Smarca1
Mybl1
Zkscan6
Nfe2l3
Rfx5
Thra
Casz1
Hoxc12
Onecut2
Zfp281
Sox14
Foxn3
Zfp462
Zfp523
Phf5a
Pbx4
Arid4b
Adnp
Zfp260
Yy2
Zfp143
Esrra
Hmg20b
Atf5
Sp2
Jund
Tsc22d3
Tcf23
Mta3
Ar
Prdm8
Irf9
Gtf3a
Zfp90
Ppp1r13l
Esr2
Pou6f2
Ikzf4
Hivep1
Creb3l4
Fiz1
Rfx4
Zfp296
Zfp410
Zc3h8
Sox12
Rfx6
Nr1d1
Whsc1
Nr2f6
Arntl2
Prdm10
Mlxipl
Thap11
Zfp9
2410018M08Rik
Zfx
Zfp62
Zbtb20
Onecut3
Kdm5d
Dmrta2
Kat7
Cnot4
Pou6f1
Arid1b
Zscan2
Arid2
Zfp128
Zfp277
Tal2
Zfp282
Zfat
Barhl1
Dbx2
Foxe3
Hsf4

## Sheet: Cardio_GO_UK_TFs
Sox4
Pbx4
Meis1
Gata1
Nfkbia
Trps1
Zfp277
Tcf21
Runx2
Hand2
Zfhx3
Rfx3
Six1
Smad4
Ovol2
Nfatc2
Nr1d1
Hhex
Dnmt1
Barx1
Vezf1
Myf6
Ppard
Tcf12
Sox15
Bhlhe40
Hes1
Rere
Runx1
Foxh1
Hic2
Fosl1
Zfp512
Creb1
Nfkb1
Smad5
Zfp202
Ncoa3
Six4
Foxg1
Nr1i2
Ets2
Foxp4
Nfatc3
Egr1
Arntl
Gata4
Mlxipl
Mafb
Mef2c
Nr0b1
Stat5b
Ppara
Npas2
Nfkb2
Pbx1
Atf6
Ncoa2
Arnt
Nr4a1
Rarb
Clock
Nkx2-6
Foxp1
Nr0b2
Stat2
Hnf1b
Nr2f2
Tfcp2l1
Tcf7l1
Prop1
Klf2
Dbp
Nr1h2
Pax3
Ncor2
Nfat5
Prox1
Mitf
Nr1h3
Smad2
Nr1i3
Mef2d
Six3
Mecom
Bcl6
Thra
Bcl3
Myb
Pdx1
Trerf1
Hnf4a
Gata3
Mycn
Klf1
Mef2a
Nkx2-5
Mkx
Hic1
Ncoa1
Pou5f1
Myog
Tead4
Pspc1
Hbp1
Nfe2
Sp7
Hand1
Atf1
Myod1
Tcf7l2
Smad3
Hmga2
Atf6b
Ncor1
Zic3
Pbrm1
Esr2
Tbx18
Foxp2
Elk1
Stat3
Nfkbiz
Nfe2l2
Hmg20b
Nfx1
Sall4
Irf5
Zfpm1
Pitx2
Rarg
Foxm1
Myc
Neurod1
Klf14
Tal1
Gbx2
Trp53
Gata6
Taf1
Foxj2
Msx1
Fos
Hey1
Irf3
Rela
Foxa2
Vdr
Smad9
Atrx
Zbtb33
Cebpb
Yy1
Nr5a2
Tbx1
Sp1
Tfap2a
Esr1
Egr3
Stat1
Twist1
Zfpm2
Foxc2
Nr3c1
Rest
Atf2
Phox2b
Sox9
Nkx2-2
Foxj1
Gata5
Tbx2
Srf
Kat8
Ets1
Osr1
Jarid2
Rel
Srebf1
Alx4
Myf5
Mixl1
Nfkbib
Atoh8
Satb2
Relb
Gzf1
Smad1
Tcf7
Arntl2
Rora
Nfatc4
Esrra
Prrx1
Irx4
Klf10
Tbx3
Tbx4
Smad6
Rxrb
Nfe2l1
Sall1
Sox11
Lef1
Pparg
Stat6
Hopx
Gli3
Dnmt3b
Scrt2
Foxo4
Nr3c2
Isl1
Sox17
Zfp239
Hif1a
Sox6
Hmga1-rs1
Zfp664
Bhlhe41
Srebf2
Lrrfip1
Smad7
Tfam
Hoxa3
Hnf1a
Tbx20
Atf4
Zkscan14
Foxj3
T
Pbx3
Tbx21
Nfatc1
Prrx2
Bcl11a
Usf1
Hey2
Tbx5
Rxra
Mesp1
Rara
Nfkbil1
Foxc1
Pgr
Nr1h4
Foxo3
Epas1
Cebpa
Nr5a1
Gata2
Irf7
Jun
Grhl3
Foxo1
Barx2
Stat5a

## Sheet: Cardio_lineage_TFs
Tead3
Zfp668
Zfp180
Snapc4
Zscan2
Mta2
Zfp438
Zfp27
Zfp451
Etv1
Foxp1
Nfatc4
Nr0b2
Zfp639
Zkscan1
Zfp90
Zfp398
Esrra
Bhlhe40
Gabpa
Nfx1
Etv6
Tgif1
Hes1
Prrx1
Tbx20
Zfp383
Rere
Stat2
Zscan21
Foxk2
Mga
Gm13157
Purg
Mier2
Nfyb
Max
Casz1
Zfp444
Tsc22d1
Zfp784
Zkscan17
Suz12
Zbtb2
Mxi1
Atf4
E2f4
Cebpd
Mef2a
Rfx5
Foxn3
Wt1
Ebf3
Zfpm1
Jund
Zbtb48
Maf
Prdm5
Tbpl1
Zfp74
Zbtb25
Zfp148
Tcf4
Nr2f2
Hinfp
Smarce1
Zhx3
Bbx
Cnot4
Sox4
Zfp867
Foxj3
Zfp317
Mlx
Stat1
Fli1
Tbp
Zfp280d
Zfp606
Zfpm2
Irx4
Snai1
Nkx2-5
Zfp512
Mafg
Csda
Creb1
Meis1
Rcor2
Ybx2
Klf10
Nfkb1
Mier3
Etv3
Zfp281
Zscan22
Maz
Thap4
Zfp251
Mynn
Cxxc1
Zfp707
Nfkbia
Thap3
Zfp526
Zscan12
Klf9
Zbtb20
Rcor3
Zfp651
Smad5
Tfcp2
Zfp637
Zbtb46
Nr3c1
Tcf7l1
Mxd4
Hmbox1
Rarg
Zfp202
Ncoa1
Pbx3
Rest
Nfib
Arid3b
Zfp579
Zfp358
Zfx
Cic
Tcf15
Zfp146
Irx3
Tead2
Rlf
Kat6b
Tfe3
Zfp777
Gatad1
Prdm4
Zfp422
Klf3
Zbtb22
Mnt
Cramp1l
Jdp2
Pspc1
Sox18
Zfp46
Atf2
Zfp142
Lyar
Ncoa3
Atmin
Zfp362
Zfp277
Sox12
Znfx1
Bcl6b
Zeb2
Pou2f1
Aebp2
Thap7
Zfp646
Phf5a
Prdm2
Nfatc1
Crebzf
Klf6
Zfp790
Zbtb45
Brpf1
Zfp653
Irf2
Id1
Ctcf
Zfp84
Zfp263
Smad6
Mta1
Zbtb21
Zfp408
Klf12
Tal1
Zbtb38
Adnp2
Fosl2
Zfp810
Zfp217
Blzf1
Bcl11a
Rxrb
Zfp322a
Klf4
Prkrir
Usf1
Tcf21
Trp53
Zfp687
Hbp1
E2f6
Klf11
Bach1
Zfp945
Gata6
Tef
Hmgxb4
Snai2
Elk3
Zfp191
Mll1
Thap11
Zfp692
Zkscan6
Tbx5
Taf1
Elf4
Tshz2
Zeb1
Zgpat
Klf2
Nfe2l1
Tead1
Zfp384
Dbp
Esrrb
Zfp629
Foxj2
Mta3
Pknox2
Zfp13
Sfpq
Klf7
Smarcc1
Erf
Rxra
Dmap1
Creb3
Nkx6-2
Whsc1
Gmeb2
Zfp319
Hes6
Elmsan1
Zfp521
Zfp768
Meis3
Zbtb14
Zfp276
Tbx2
Foxk1
Zhx1
Zfp770
Helz2
Atf3
Hand2
Scx
Zfp414
Hey1
Zbed3
Nr2f1
Rara
Lyl1
Zfhx3
Zfp524
Klf13
Plagl2
Ybx1
Nr1h2
Zfp697
Znf512b
Smarca5
E2f5
Zbtb44
Irf3
Stat6
Purb
Irx5
Foxc1
Zfp445
Zfp28
Ahr
Srf
Zbtb43
Zfp511
Kat8
Ets1
Nfix
Ncor2
Smarcc2
Zfp30
Zbtb17
Tfeb
Pou6f1
Nfat5
Kat5
Atf1
Id3
Gtf3a
Hmg20a
Zkscan5
Hopx
Ets2
Tada2a
Tada2b
Rela
Zbtb5
Xbp1
Irf9
Zfp628
Foxp4
Tshz1
Atf7
Zfp260
Gmeb1
Nfatc3
Zfp592
Zfp275
Sfpi1
Egr1
Smad4
Nr2c1
Ebf1
Zfp623
Tcf7l2
Arntl
Arid4a
Zfp507
Nfia
Foxo3
Cebpg
Kat6a
Gata4
Mafk
Creb3l1
Prdm10
Zfp612
Crem
Zfhx2
Zbtb42
Rreb1
Jarid2
Zfp407
Prox1
Zbtb11
Mafb
Mitf
Gatad2b
Irf1
Pogz
Zfp574
Ubp1
Pura
Smad3
Mef2c
Nono
Arid5b
Srebf1
Rorc
Zbed6
Dnajc2
Atf6b
Zbtb4
Foxn2
Foxo4
Zfp266
Cux1
Creb3l2
Epas1
Ncor1
Zfp143
Zscan25
Erg
Sp4
Zfp523
Stat5b
Sox17
Zfp386
Nfatc2
Ddit3
Rbpj
Dnajc1
Atrx
Elk4
Atoh8
Rc3h2
Zfp513
Pbx2
Zfp335
Patz1
Zfp652
Pknox1
Rfx1
Zfp62
Hlx
Tfdp1
Hmgxb3
Six5
Rxrg
Nfyc
Nr1d1
Glis2
Smad2
Zfp467
Zbtb41
Zfp236
Hif1a
Nfil3
Mef2d
Pbrm1
Zfp91
Gatad2a
Kdm5c
Zfp672
Hhex
Zbtb12
Dnmt1
Wbp7
Zkscan3
Ppp1r13l
Tcf25
Zfp213
Zfp775
Zfp654
Arid1b
Irx1
Zxdc
Dmtf1
Tcf3
Elf1
Nfya
Myrf
Gata2
Gzf1
Sox6
Tsc22d3
E4f1
Zfp292
Ubtf
Mxd1
Nfkb2
Pbx1
Zscan26
Phtf2
Zfp827
Cebpb
Ikzf5
Thap2
Hlf
Mecom
Vezf1
Rfx7
Zfp664
Atf5
Srebf2
Yy1
Atf6
Tox4
Mlxip
Nr1d2
Zc3h4
Bcl6
Tsc22d4
Elf2
Zbtb1
Zfp746
Sp3
Hivep2
Meis2
Esrrg
Smad1
Rfxap
Zbtb40
Nfic
Kdm5b
Ncoa2
Jun
Rcor1
Arnt
Arid2
Nr2f6
Adnp
Sox13
Csrnp1
Zfp787
Nr4a1
Zfp580
Ppard
Hsf1
Cux2
Cdc5l
Sp2
Thra
Zbtb7a
Tfdp2
Ssrp1
Usf2
Tcf12
Zfp1
Mbd1
Irx2
Zbtb18
Deaf1
Lrrfip1
Zfp655
Zfp771
Rarb
Zfp410
Zfp397
Elk1
Smad7
Zfp710
Tfam
Foxo1
Id2
Stat3
Irf8
Zfp282
Hsf2
Thap1
Stat5a
Dnmt3a
Phtf1
Meox1
Arid4b
Kat7
Nrf1
Zhx2
Zbtb24
Etv5
Zfp553
Nfe2l2
Sox7
Clock
Zfp449
Tsc22d2
Sp1
Zfp644
Hmg20b
Dpf2
Zfp219
Zfp516
Kdm2a
Kdm5a
Mier1
Rfxank
Arid1a
Rora
Hivep1
Fiz1

## Sheet: core_TFs
Foxp1
Nfatc4
Prrx1
Tbx20
Rere
Mef2a
Zfpm1
Nr2f2
Sox4
Stat1
Zfpm2
Irx4
Nkx2-5
Creb1
Meis1
Smad5
Nr3c1
Tcf7l1
Rarg
Atf2
Nfatc1
Smad6
Tal1
Rxrb
Tcf21
Trp53
Gata6
Tbx5
Klf2
Rxra
Tbx2
Hand2
Hey1
Rara
Nr1h2
Foxc1
Srf
Ets1
Ncor2
Nfat5
Hopx
Ets2
Rela
Foxp4
Nfatc3
Egr1
Smad4
Arntl
Foxo3
Gata4
Jarid2
Prox1
Mafb
Smad3
Mef2c
Epas1
Atrx
Smad2
Hif1a
Mef2d
Pbrm1
Hhex
Gata2
Sox6
Pbx1
Mecom
Vezf1
Bcl6
Smad1
Jun
Arnt
Thra
Rarb
Smad7
Tfam
Foxo1
Stat3
Nfe2l2
Clock
Sp1
Rora

## Sheet: CardioJournalDistribution_norm
Journal Name	Weinstein-like abstract number	Total publications	Initial Year	Total year		Publication_rate
NEURAL DEV	40	261	2007	6	153.257	25.54278416
CELL STEM CELL	96	1214	2007	6	79.0774	13.1796
BMC DEV BIOL	120	783	2001	12	153.257	12.7714
CELL ADH MIGR	36	495	2007	6	72.7273	12.1212
MOL CELL BIOL	358	1046	1981	32	342.256	10.6955
GENE EXPR PATTERNS	100	978	2003	10	102.249	10.2249
GENESIS	110	1231	2000	13	89.3582	6.87371
DEV CELL	222	2813	2001	12	78.9193	6.57661
CELL MOTIL CYTOSKELETON	38	1738	2009	4	21.8642	5.46605
DEV DYN	440	4419	1992	21	99.57	4.74143
STEM CELLS DEV	70	1808	2004	9	38.7168	4.30187
BMC CELL BIOL	35	724	2001	12	48.3425	4.02855
EVOL DEV	37	716	2000	13	51.676	3.97508
PLOS GENET	129	4240	2005	8	30.4245	3.80307
NAT CELL BIOL	124	2537	1999	14	48.8766	3.49119
DEV GENES EVOL	52	1114	1996	17	46.6786	2.7458
PLOS BIOL	51	2054	2003	10	24.8296	2.48296
DEVELOPMENT	718	11288	1987	26	63.6074	2.44644
CELLS TISSUES ORGANS (PRINT)	33	988	1999	14	33.4008	2.38577
MECH DEV	152	2996	1990	23	50.7343	2.20584
EUR J ECHOCARDIOGR	33	1251	2001	12	26.3789	2.19824
GENES CELLS	62	1696	1996	17	36.5566	2.15039
CELL CYCLE	106	4771	2002	11	22.2176	2.01978
NAT STRUCT MOL BIOL	33	1895	2004	9	17.4142	1.93492
INT J DEV BIOL	114	2479	1989	24	45.9863	1.9161
EMBO REP	41	1832	2001	12	22.3799	1.86499
J CELL MOL MED	44	2186	2002	11	20.1281	1.82983
MOL BIOL CELL	281	7382	1992	21	38.0656	1.81265
CELL RES	39	1405	1997	16	27.758	1.73488
HEART RHYTHM	29	1958	2004	9	14.811	1.64567
CARDIOVASC PATHOL	30	913	1992	21	32.8587	1.5647
DEV BIOL	968	11807	1960	53	81.9853	1.54689
STEM CELLS	173	3772	1981	32	45.8643	1.43326
INTERACT CARDIOVASC THORAC SURG	31	3813	2007	6	8.13008	1.35501
SEMIN CELL DEV BIOL	29	1483	1997	16	19.555	1.22218
CURR TOP DEV BIOL	29	531	1966	47	54.6139	1.162
DEV GROWTH DIFFER	60	1220	1969	44	49.1803	1.11773
GENES DEV	176	6629	1987	26	26.55	1.02115
HUM MOL GENET	158	8100	1992	21	19.5062	0.928865
MOL CELL	68	5351	1998	15	12.7079	0.847194
AM J PHYSIOL, CELL PHYSIOL	49	4671	2000	13	10.4903	0.806943
MOL CELL NEUROSCI	46	2654	1990	23	17.3323	0.75358
INT J BIOCHEM CELL BIOL	54	4001	1995	18	13.4966	0.749813
AM J PHYSIOL HEART CIRC PHYSIOL	81	8390	2000	13	9.65435	0.742642
PLOS ONE	491	102971	2006	7	4.76833	0.68119
DIFFERENTIATION	60	2301	1973	40	26.0756	0.65189
NAT NEUROSCI	32	3276	1998	15	9.76801	0.651201
CURR BIOL	144	10081	1991	22	14.2843	0.649286
ARTERIOSCLER THROMB VASC BIOL	77	6717	1995	18	11.4635	0.636858
CELL SIGNAL	55	3731	1989	24	14.7414	0.614223
PEDIATR CARDIOL	69	3630	1982	31	19.0083	0.61317
J MOL CELL CARDIOL	142	5572	1970	43	25.4846	0.592664
J CELL SCI	280	12081	1966	47	23.1769	0.493125
CIRC RES	253	9939	1953	60	25.4553	0.424255
NAT GENET	42	4825	1992	21	8.70466	0.414508
FASEB J	81	8302	1987	26	9.75669	0.375257
J CELL BIOCHEM	75	7719	1982	31	9.71628	0.313429
INT J CARDIOL	101	11364	1981	32	8.88772	0.277741
EUR J CELL BIOL	32	3573	1979	34	8.95606	0.263414
ONCOGENE	112	16905	1987	26	6.62526	0.254818
PLANT CELL	31	5188	1989	24	5.97533	0.248972
CARDIOVASC RES	86	7550	1967	46	11.3907	0.247625
J CELL BIOL	232	18879	1962	51	12.2888	0.240957
EMBO J	116	16611	1982	31	6.98332	0.225269
J AM SOC NEPHROL	32	6366	1990	23	5.0267	0.218552
MOL ENDOCRINOL	30	5325	1987	26	5.6338	0.216685
EXP CELL RES	130	10854	1953	60	11.9772	0.199619
CELL	103	14445	1974	39	7.13049	0.182833
NEURON	35	7897	1988	25	4.43206	0.177283
J NEUROSCI	133	30025	1981	32	4.42964	0.138426
BLOOD	255	33163	1946	67	7.68929	0.114766
CELL TISSUE RES	46	10322	1974	39	4.4565	0.114269
PACING CLIN ELECTROPHYSIOL	29	7974	1978	35	3.63682	0.103909
BIOCHEM BIOPHYS RES COMMUN	278	57749	1960	53	4.81394	0.090829
J BIOL CHEM	848	142885	1945	68	5.93484	0.0872771
NATURE	152	25670	1945	68	5.92131	0.0870781
J CELL PHYSIOL	59	9984	1945	68	5.90946	0.0869038
NUCLEIC ACIDS RES	108	32310	1974	39	3.34262	0.0857082
BIOL REPROD	32	10669	1969	44	2.99934	0.0681669
BONE	37	21900	1985	28	1.6895	0.0603392
METHODS MOL BIOL	37	21900	1984	29	1.6895	0.0582585
ANN THORAC SURG	57	22235	1965	48	2.56353	0.0534068
J THORAC CARDIOVASC SURG	32	11648	1959	54	2.74725	0.0508751
GENETICS	100	20434	1916	97	4.8938	0.0504516
INVEST OPHTHALMOL VIS SCI	30	17289	1977	36	1.73521	0.0482002
GENE	29	17451	1977	36	1.6618	0.046161
PROC NATL ACAD SCI USA	453	102524	1915	98	4.41848	0.0450865
J CLIN INVEST	80	20941	1925	88	3.82026	0.043412
J MOL BIOL	50	21971	1960	53	2.27573	0.0429382
AM J PATHOL	42	12942	1925	88	3.24525	0.0368778
CIRCULATION	53	25120	1950	63	2.10987	0.03349
FEBS LETT	50	34477	1968	45	1.45024	0.0322276
J COMP NEUROL	32	14753	1945	68	2.16905	0.0318978
ENDOCRINOLOGY	36	25344	1945	68	1.42045	0.020889
CANCER RES	50	39261	1945	68	1.27353	0.0187284
BIOCHIM BIOPHYS ACTA	75	64657	1948	65	1.15997	0.0178456
J EXP MED	34	21447	1896	117	1.5853	0.0135496
J IMMUNOL	44	51635	1945	68	0.852135	0.0125314
BIOCHEMISTRY	30	55847	1962	51	0.537182	0.010533
SCIENCE	65	49164	1880	133	1.32211	0.00994064
