# Supplementary material for: CardioTF, a database of deconstructing transcriptional circuits in the heart system
Source: PeerJ journal article supplement (doi:10.7717/peerj.2339), 2016-08-23
Supplement: Supplemental_Figure_S2.pdf [file Supplemental_Figure_S2.pdf]

| Annotation Cluster 7     |               | Enrichment Score: 12.99                                         | G  |    | Count | P_Value | Benjamini |
|--------------------------|---------------|-----------------------------------------------------------------|----|-------------------------------------------------------------------------------------|-------|---------|-----------|
| <input type="checkbox"/> | GOTERM_BP_FAT | <a href="#">cardiac muscle tissue development</a>               | RT |   | 14    | 7.2E-18 | 3.8E-16   |
| <input type="checkbox"/> | GOTERM_BP_FAT | <a href="#">striated muscle tissue development</a>              | RT |  | 16    | 6.0E-16 | 2.0E-14   |
| <input type="checkbox"/> | GOTERM_BP_FAT | <a href="#">muscle tissue development</a>                       | RT |  | 16    | 1.8E-15 | 6.2E-14   |
| <input type="checkbox"/> | GOTERM_BP_FAT | <a href="#">cardiac cell differentiation</a>                    | RT |  | 11    | 2.3E-15 | 7.9E-14   |
| <input type="checkbox"/> | GOTERM_BP_FAT | <a href="#">cardiac muscle cell differentiation</a>             | RT |  | 10    | 3.4E-14 | 1.0E-12   |
| <input type="checkbox"/> | GOTERM_BP_FAT | <a href="#">muscle organ development</a>                        | RT |  | 16    | 8.5E-14 | 2.4E-12   |
| <input type="checkbox"/> | GOTERM_BP_FAT | <a href="#">muscle cell differentiation</a>                     | RT |  | 13    | 3.4E-12 | 9.0E-11   |
| <input type="checkbox"/> | GOTERM_BP_FAT | <a href="#">striated muscle cell differentiation</a>            | RT |  | 10    | 2.3E-9  | 4.7E-8    |
| <input type="checkbox"/> | GOTERM_BP_FAT | <a href="#">ventricular cardiac muscle cell differentiation</a> | RT |  | 6     | 2.8E-9  | 5.5E-8    |

| Annotation Cluster 8     |               | Enrichment Score: 11.55                    | G  |   | Count | P_Value | Benjamini |
|--------------------------|---------------|--------------------------------------------|----|--------------------------------------------------------------------------------------|-------|---------|-----------|
| <input type="checkbox"/> | GOTERM_BP_FAT | <a href="#">vasculature development</a>    | RT |   | 19    | 4.1E-15 | 1.4E-13   |
| <input type="checkbox"/> | GOTERM_BP_FAT | <a href="#">blood vessel morphogenesis</a> | RT |   | 17    | 2.7E-14 | 8.3E-13   |
| <input type="checkbox"/> | GOTERM_BP_FAT | <a href="#">blood vessel development</a>   | RT |   | 18    | 4.5E-14 | 1.3E-12   |
| <input type="checkbox"/> | GOTERM_BP_FAT | <a href="#">angiogenesis</a>               | RT |  | 8     | 1.3E-5  | 1.6E-4    |
