# Supplementary material for: CardioTF, a database of deconstructing transcriptional circuits in the heart system
Source: PeerJ journal article supplement (doi:10.7717/peerj.2339), 2016-08-23

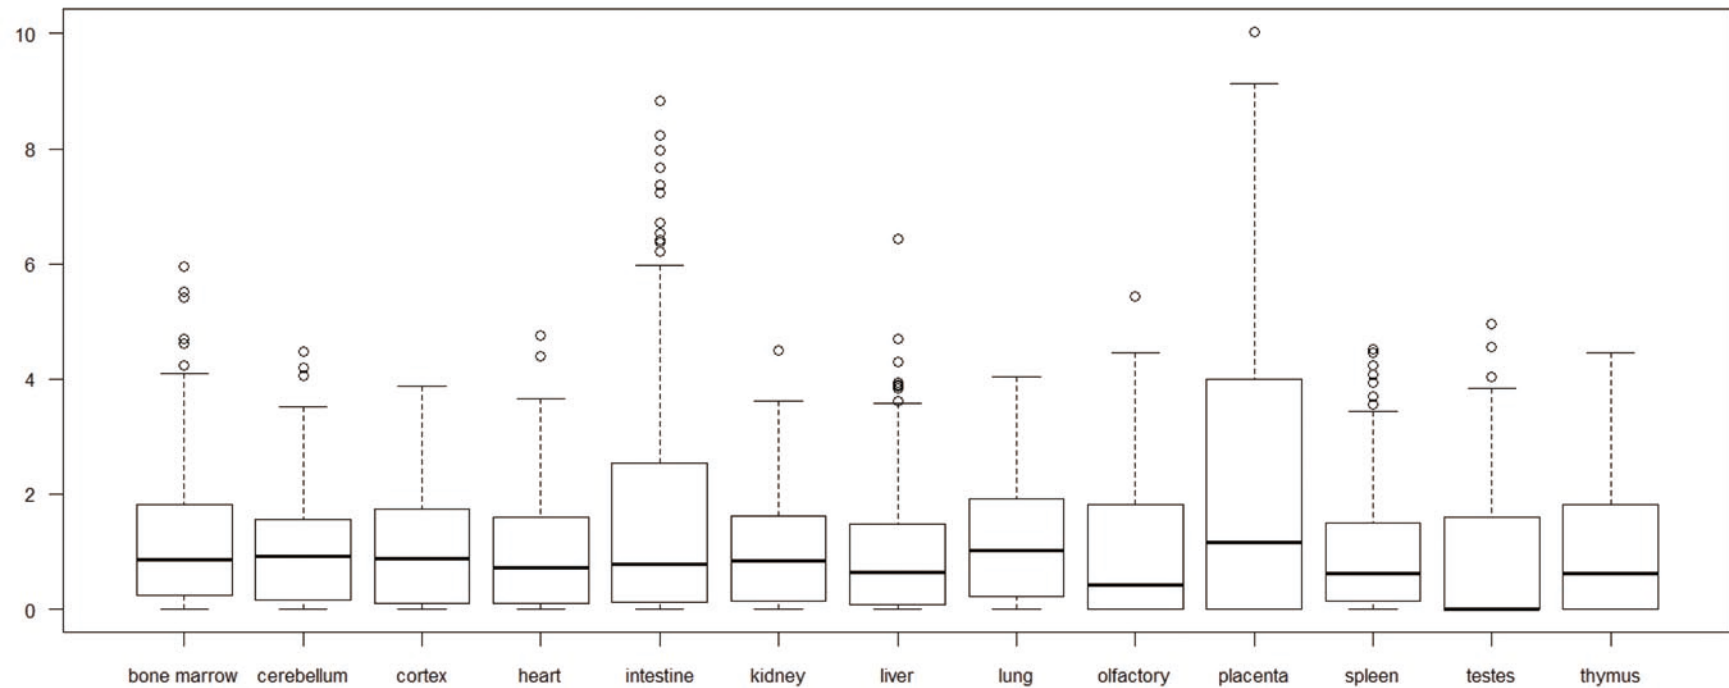

Supplement: Supplemental_Figure_S5.pdf [file Supplemental_Figure_S5.pdf]
